# Supplementary material for: Defenses of whirligig beetles against native and invasive frogs
Source: PeerJ. 2024 Apr 16;12:e17214. doi: 10.7717/peerj.17214 (PMC11027905; doi:10.7717/peerj.17214)
Supplement: Supplemental Information 1 [file peerj-12-17214-s001.xlsx]

## Sheet: Sheet1
Prey_species	Prey_code	Prey_length_mm	Prey_weight_mg	Treatment	Predator_species	Predator_code	Predator_SVL_mm	Predator_BW_mg	Result
Dineutus_orientalis	Dineutus_orientalis_2023_3	10.61	51	Control	Aquarana_catesbeiana	Ac_2022_56	101.02	89130	Swallow
Dineutus_orientalis	Dineutus_orientalis_2023_4	10.76	48.3	Control	Aquarana_catesbeiana	Ac_2022_55	95.98	77160	Swallow
Dineutus_orientalis	Dineutus_orientalis_2023_5	10.85	49.4	Control	Aquarana_catesbeiana	Ac_2023_1	56.24	13455.9	Swallow
Dineutus_orientalis	Dineutus_orientalis_2023_6	10.69	50.8	Control	Aquarana_catesbeiana	Ac_2023_2	43.74	6149.4	Swallow
Dineutus_orientalis	Dineutus_orientalis_2023_7	10.26	47.4	Control	Aquarana_catesbeiana	Ac_2023_3	64.9	21129	Swallow
Dineutus_orientalis	Dineutus_orientalis_2023_8	11.35	55.4	Control	Aquarana_catesbeiana	Ac_2023_4	48.31	8940.6	Swallow
Dineutus_orientalis	Dineutus_orientalis_2023_9	10.72	50.9	Control	Aquarana_catesbeiana	Ac_2021_56	98.25	79280	Swallow
Dineutus_orientalis	Dineutus_orientalis_2023_10	10.56	56	Control	Aquarana_catesbeiana	Ac_2023_5	50.39	9049.3	Swallow
Dineutus_orientalis	Dineutus_orientalis_2023_18	10.24	36	Control	Aquarana_catesbeiana	Ac_2023_6	94.82	60490	Swallow
Dineutus_orientalis	Dineutus_orientalis_2023_23	10.13	35.8	Control	Aquarana_catesbeiana	Ac_2023_9	53.74	10893.5	Swallow
Dineutus_orientalis	Dineutus_orientalis_2023_22	9.66	34.8	Control	Aquarana_catesbeiana	Ac_2023_7	71.84	26761.2	Swallow
Dineutus_orientalis	Dineutus_orientalis_2023_27	10.36	39.6	Control	Aquarana_catesbeiana	Ac_2023_13	56.16	15678.9	Swallow
Dineutus_orientalis	Dineutus_orientalis_2023_29	10.29	43.2	Control	Aquarana_catesbeiana	Ac_2023_20	51.41	13105.6	Swallow
Dineutus_orientalis	Dineutus_orientalis_2023_33	10.01	40.2	Control	Aquarana_catesbeiana	Ac_2023_38	60.01	15875.8	Swallow
Dineutus_orientalis	Dineutus_orientalis_2023_32	10.37	37.2	Control	Aquarana_catesbeiana	Ac_2023_12	49.01	11347.8	Swallow
Dineutus_orientalis	Dineutus_orientalis_1	10.41	28.5	Control	Pelophylax_nigromaculatus	Pn_2022_97	43.46	7643.7	Swallow
Dineutus_orientalis	Dineutus_orientalis_2	10.15	30.4	Control	Pelophylax_nigromaculatus	Pn_2022_98	32.95	3019.7	Spit_out
Dineutus_orientalis	Dineutus_orientalis_3	10.31	36.9	Control	Pelophylax_nigromaculatus	Pn_2022_94	42	6024.9	Spit_out
Dineutus_orientalis	Dineutus_orientalis_4	10.35	37	Control	Pelophylax_nigromaculatus	Pn_2022_99	39.57	5515.7	Swallow
Dineutus_orientalis	Dineutus_orientalis_5	9.59	33.9	Control	Pelophylax_nigromaculatus	Pn_2022_100	33.82	3162.3	Spit_out
Dineutus_orientalis	Dineutus_orientalis_6	10.37	38	Control	Pelophylax_nigromaculatus	Pn_2022_101	43.19	7230	Swallow
Dineutus_orientalis	Dineutus_orientalis_2023_1	11.2	62.1	Control	Pelophylax_nigromaculatus	Pn_2023_4	38.72	4512.4	Swallow
Dineutus_orientalis	Dineutus_orientalis_2023_2	10.41	41.2	Control	Pelophylax_nigromaculatus	Pn_2023_5	37.39	4030.3	Swallow
Dineutus_orientalis	Dineutus_orientalis_2023_15	10.98	47.2	Control	Pelophylax_nigromaculatus	Pn_2023_33	36.58	3612.3	Spit_out
Dineutus_orientalis	Dineutus_orientalis_2023_16	9.89	45.9	Control	Pelophylax_nigromaculatus	Pn_2023_34	34.51	3399.9	Swallow
Dineutus_orientalis	Dineutus_orientalis_2023_17	9.78	38.7	Control	Pelophylax_nigromaculatus	Pn_2023_35	34.56	3052.5	Stop_attack
Dineutus_orientalis	Dineutus_orientalis_2023_25	9.28	35.2	Control	Pelophylax_nigromaculatus	Pn_2023_36	37.49	4089.8	Spit_out
Dineutus_orientalis	Dineutus_orientalis_2023_30	10.25	34.3	Control	Pelophylax_nigromaculatus	Pn_2023_59	46.78	8369	Swallow
Dineutus_orientalis	Dineutus_orientalis_2023_34	9.8	28.2	Control	Pelophylax_nigromaculatus	Pn_2023_69	65.5	24931.8	Swallow
Dineutus_orientalis	Dineutus_orientalis_2023_35	10.33	39.5	Control	Pelophylax_nigromaculatus	Pn_2023_80	38.22	3887.5	Swallow
Gyrinus_japonicus	Gyrinus_japonicus_2023_12	6.7	14.8	Control	Aquarana_catesbeiana	Ac_2023_10	48.36	10666.3	Swallow
Gyrinus_japonicus	Gyrinus_japonicus_2023_13	6.43	11.9	Control	Aquarana_catesbeiana	Ac_2023_15	54.01	17072.4	Swallow
Gyrinus_japonicus	Gyrinus_japonicus_2023_14	6.64	15.9	Control	Aquarana_catesbeiana	Ac_2023_17	56.79	16443.2	Swallow
Gyrinus_japonicus	Gyrinus_japonicus_2023_15	6.2	12.9	Control	Aquarana_catesbeiana	Ac_2023_19	56.47	15645.2	Swallow
Gyrinus_japonicus	Gyrinus_japonicus_2023_19	6.47	18.5	Control	Aquarana_catesbeiana	Ac_2023_22	53.27	11730.9	Swallow
Gyrinus_japonicus	Gyrinus_japonicus_2023_18	7.24	16.2	Control	Aquarana_catesbeiana	Ac_2023_23	55.99	15499.7	Swallow
Gyrinus_japonicus	Gyrinus_japonicus_2023_17	7.77	18.8	Control	Aquarana_catesbeiana	Ac_2023_24	49.84	10833.4	Swallow
Gyrinus_japonicus	Gyrinus_japonicus_2023_21	6.79	15.6	Control	Aquarana_catesbeiana	Ac_2023_25	47.36	8503.7	Swallow
Gyrinus_japonicus	Gyrinus_japonicus_2023_22	7.5	18.6	Control	Aquarana_catesbeiana	Ac_2023_18	47.59	9795.2	Swallow
Gyrinus_japonicus	Gyrinus_japonicus_2023_23	7.36	18.4	Control	Aquarana_catesbeiana	Ac_2023_26	53.44	13991.9	Swallow
Gyrinus_japonicus	Gyrinus_japonicus_2023_24	7.26	19.4	Control	Aquarana_catesbeiana	Ac_2023_27	57.97	15778.8	Swallow
Gyrinus_japonicus	Gyrinus_japonicus_2023_25	6.56	14.2	Control	Aquarana_catesbeiana	Ac_2023_35	50.77	11214.5	Swallow
Gyrinus_japonicus	Gyrinus_japonicus_2023_26	6.92	19.5	Control	Aquarana_catesbeiana	Ac_2023_37	35.18	3087.3	Swallow
Gyrinus_japonicus	Gyrinus_japonicus_2023_27	7.84	19.4	Control	Aquarana_catesbeiana	Ac_2023_39	56.28	15374.3	Swallow
Gyrinus_japonicus	Gyrinus_japonicus_2023_28	7.57	18.8	Control	Aquarana_catesbeiana	Ac_2023_16	58.26	15101.4	Swallow
Gyrinus_japonicus	Gyrinus_japonicus_1	7.4	17	Control	Pelophylax_nigromaculatus	Pn_2022_93	34.04	2368.7	Swallow
Gyrinus_japonicus	Gyrinus_japonicus_2	6.84	15.9	Control	Pelophylax_nigromaculatus	Pn_2022_90	24.64	1022.5	Spit_out
Gyrinus_japonicus	Gyrinus_japonicus_3	7.23	18.1	Control	Pelophylax_nigromaculatus	Pn_2022_102	36.41	3554.6	Swallow
Gyrinus_japonicus	Gyrinus_japonicus_4	7.04	14.6	Control	Pelophylax_nigromaculatus	Pn_2022_72	26.87	1611.5	Swallow
Gyrinus_japonicus	Gyrinus_japonicus_5	6.73	12.3	Control	Pelophylax_nigromaculatus	Pn_2022_103	31.62	2413.6	Swallow
Gyrinus_japonicus	Gyrinus_japonicus_2023_1	7.63	20.1	Control	Pelophylax_nigromaculatus	Pn_2023_37	36.39	4029.8	Stop_attack
Gyrinus_japonicus	Gyrinus_japonicus_2023_3	7.24	16	Control	Pelophylax_nigromaculatus	Pn_2023_38	40.51	4669.3	Spit_out
Gyrinus_japonicus	Gyrinus_japonicus_2023_5	7.68	22.7	Control	Pelophylax_nigromaculatus	Pn_2023_39	36.26	3478.3	Ignore
Gyrinus_japonicus	Gyrinus_japonicus_2023_6	7.27	20.2	Control	Pelophylax_nigromaculatus	Pn_2023_40	58.26	17626.7	Swallow
Gyrinus_japonicus	Gyrinus_japonicus_2023_7	6.77	13.7	Control	Pelophylax_nigromaculatus	Pn_2023_41	37.51	3632.9	Spit_out
Gyrinus_japonicus	Gyrinus_japonicus_2023_10	7.18	18.5	Control	Pelophylax_nigromaculatus	Pn_2023_42	40.02	4556	Stop_attack
Gyrinus_japonicus	Gyrinus_japonicus_2023_11	6.4	16	Control	Pelophylax_nigromaculatus	Pn_2023_43	53.29	13314.6	Swallow
Gyrinus_japonicus	Gyrinus_japonicus_2023_29	6.88	17.2	Control	Pelophylax_nigromaculatus	Pn_2023_63	46.4	7724.2	Swallow
Gyrinus_japonicus	Gyrinus_japonicus_2023_30	6.95	17.6	Control	Pelophylax_nigromaculatus	Pn_2023_81	42.7	6700.2	Swallow
Gyrinus_japonicus	Gyrinus_japonicus_2023_31	6.01	10	Control	Pelophylax_nigromaculatus	Pn_2023_72	33.41	2692.6	Swallow
